# Supplementary material for: Modelling and Analysis of the Feeding Regimen Induced Entrainment of Hepatocyte Circadian Oscillators Using Petri Nets
Source: PubMed Central journal article supplement (PMC4366204; doi:10.1371/journal.pone.0117519), 2015-03-19
Supplement: pone.0117519.s001.pdf [file pone.0117519.s001.pdf]

## Formal Definitions

### Qualitative States

Qualitative states are the configurations of the BRN based on the discrete expression levels of the entities of the BRN. A set 'S' of all qualitative states of a BRN  $G(V,E)$  is defined as,  $S = \prod_{v_i \in V} Z_{v_i}$ .

A tuple  $s \in S$ , defined as  $(s_{x_{v_i}}) \forall v_i \in V$ , represents one particular configuration of the system, with  $x_{v_i}$  representing the expression level of the entity  $v_i$ . Two configurations  $s_m \in S$  and  $s_n \in S$  for  $m \neq n$  differ in at least one  $x_{v_i}$ . All possible configurations of the system constitute the state space of the system, which when represented as a directed graph is known as the state graph of the system/BRN.

### Resources

In a given configuration of a BRN, the set of resources  $Q_{x_{v_j}}$  for any entity  $v_j \in V$  are defined as  $Q_{x_{v_j}} = \{v_i \in G^-(v_j) | (x_{v_i} \geq j_{v_i v_j} \wedge \eta_{v_i v_j} = +) \vee (x_{v_i} < j_{v_i v_j} \wedge \eta_{v_i v_j} = -)\}$ . This implies that an inhibitor  $v_i \in G^-(v_j)$  is treated as resources of  $v_j$  iff it is absent in the given configuration.

### Logical Parameters

The set of logical parameters governing the dynamics of a BRN  $G$  is formally defined as  $K(G) = \{K_{v_i}(Q_{x_{v_i}}) \in Z_{v_i} \forall v_i \in V\}$ .

The discrete evolution of the entity  $v_i$  at level  $x_{v_i}$  is inferred by the parameter  $K_{v_i}(Q_{x_{v_i}})$  using the evolution operator  $\uparrow$  following the rule:

$$x_{v_i} \uparrow K_{v_i}(Q_{x_{v_i}}) = \begin{cases} x_{v_i} + 1 & \text{if } x_{v_i} < K_{v_i}(Q_{x_{v_i}}); \\ x_{v_i} & \text{if } x_{v_i} = K_{v_i}(Q_{x_{v_i}}); \\ x_{v_i} - 1 & \text{if } x_{v_i} > K_{v_i}(Q_{x_{v_i}}). \end{cases}$$

### Firing Rule

A transition  $t \in T$  is enabled and may fire (represented as  $m[t]$ ) if and only if  $m(p) \geq f(p,t) \forall p \in {}^\circ t$ .

The markings of the Petri Net after firing are satisfied as  $m'(p) = m(p) - f(p,t) + f(t,p) \forall p \in P$ .

### Cycle

A cycle is an array of markings of length  $n$ , formed from the firing of more than one transition, such that  $m_0(p) = m_n(p) \forall p \in P$ .

### Deadlock

A deadlock is a marking in the Reachability Graph from which no transition is enabled or live, that is  $\neg(m[t]) \forall t \in T$  holds.
